# Supplementary material for: A High Molecular-Mass Anoxybacillus sp. SK3-4 Amylopullulanase: Characterization and Its Relationship in Carbohydrate Utilization
Source: PubMed Central journal article supplement (PMC3709733; doi:10.3390/ijms140611302), 2013-05-28

```

5551 ATGACACGTGCCAGTTTGCTGTGTTGCTTGACGCGCATTAGCATTGCCACATGAAACATATGACGGTCGATTT
1851 M T R A Q F A V L L V R A L A L P H E T Y D G R F
    ★★★★★★★★★★★★★★★★★★★★★★★★★★★★★★★★★★★★★★★★★★
5626 GCTGATGTAAAAGGCACAGAATGGTTTAACAAAAACGGTGAATTAGCGGCTGCAGTCAAAC TAGGTATCATTCAA
1876 A D V K G T E W F N K N G E L A A A V K L G I I Q
    ★★★★★★★★★★★★★★★★★★★★★★★★★★★★★★★★★★★★★★★★★★
5701 GGAAAAACAGCCAATACGTTTGCGCCGAATGAGCCAATCACTCGCGCCGAAGCAGCTGTTATGATCGAGCGAGCA
1901 G K T A N T F A P N E P I T R A E A A V M I E R A
    ★★★★★★★★★★★★★★★★★★★★★★★★★★★★★★★★★★★★★★★★★★
5776 TTGAAGCTTTTCGTTTGGTATAATGAAGCAACAAACGACAAAAAGGTAACAGATTTCCGCGATGCA
1926 L K L S F V G Y N E A T N D K T K K V T D F R D A
    ★★★★★★★★★★★★★★★★★★★★★★★★★★★★★★★★★★★★★★★★★★
5851 AAACAATGGCCAACATGGGCAAAACAGCGATTGAAGCAGTATACCAAGCAGGAGTCATGCAAGGACGAGATAAT
1951 K Q L P T W A K Q A I E A V Y Q A G V M Q G R D N
    ★★★★★★★★★★★★★★★★★★★★★★★★★★★★★★★★★★★★★★★★★★
5926 GGAAGCTTTGATCCTACGAGCCATATGACGCGTGCAGAAATGGCGAAAGTATTGGTGAGATTTTAGGAAAAGTA
1976 G S F D P T S H M T R A E M A K V L V E F L G K V
    ★★★★★★★★★★★★★★★★★★★★★★★★★★★★★★★★★★★★★★★★★★
6001 AAATTGATGTAA
2001 K L M
    ★★★★★
    
```

**Figure S2.** The comparison of conserved regions of various  $\alpha$ -amylase (Amy), cyclodextrin glucanotransferase (CGTase), type I pullulanase (Pul), and amylopullulanase (Apu) using WebLogo 3.3.

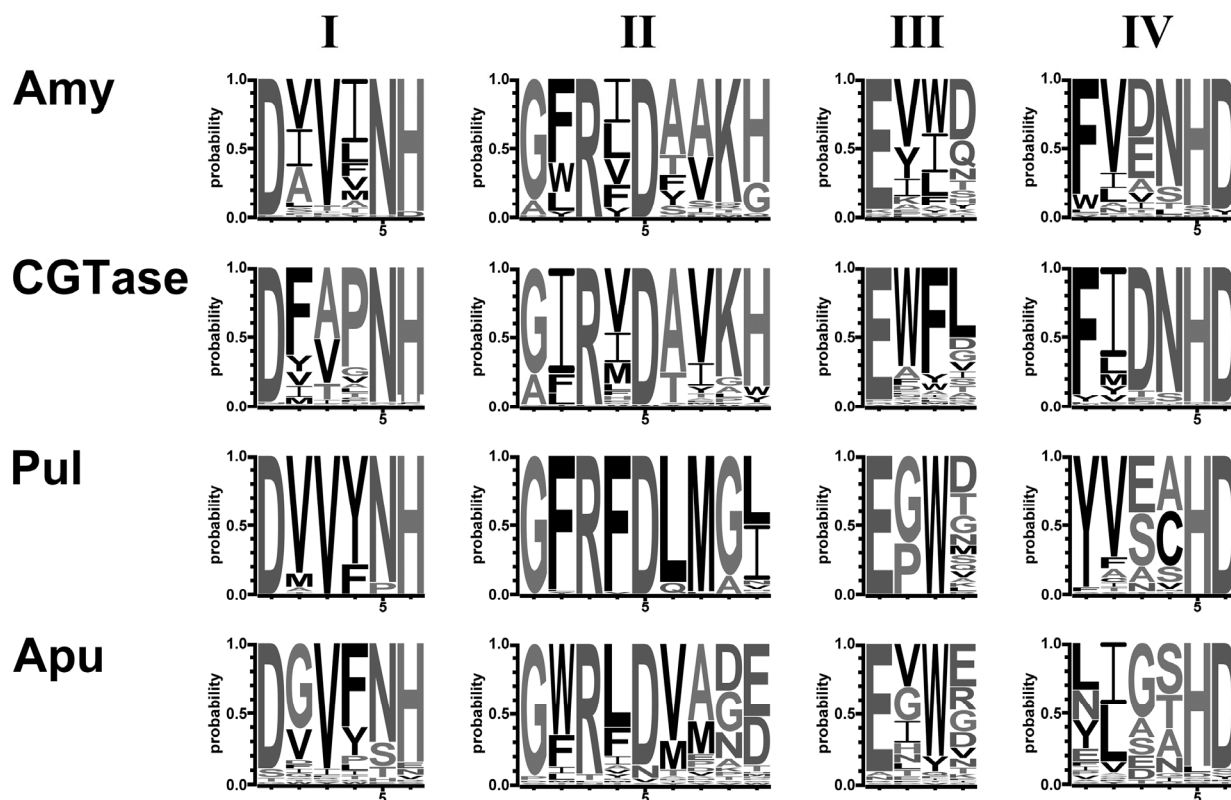

**Figure S3.** (a) SDS-PAGE (12%) and (b) Native-PAGE (12%) of the purified ApuASK. Zymogram for (c) pullulytic activity and (d) amylolytic activity of the purified ApuASK. Lane 1, standard molecular weight marker; Lane 2, purified ApuASK. Arrows pointing the band correspond to the purified ApuASK.

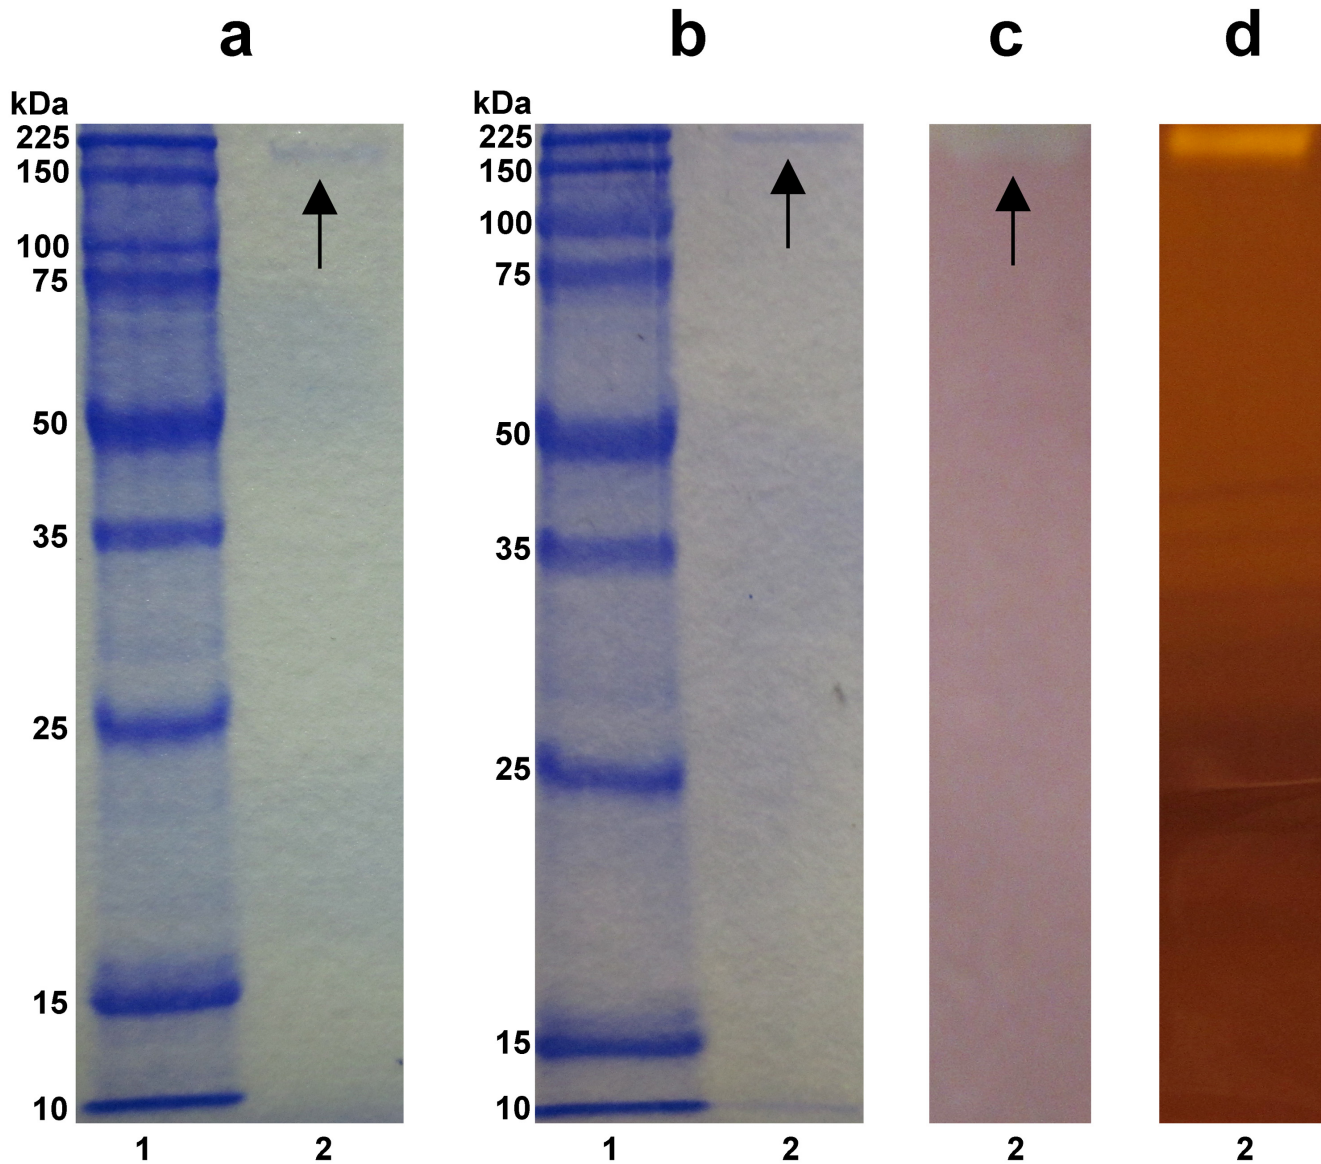

Supplement: ijms-14-11302-s001.pdf [file ijms-14-11302-s001.pdf]
